# Supplementary material for: Clinical Outcome Evaluation of Anatomic Anterior Cruciate Ligament Reconstruction With Tunnel Positioning Using Gold Standard Techniques: A Systematic Review and Meta-analysis
Source: PubMed Central journal article supplement — Orthop J Sports Med. 2021 Jun 28;9(6):23259671211013327. doi: 10.1177/23259671211013327 (PMC8243110; doi:10.1177/23259671211013327), 2021-06-28
Supplement: sj-pdf-1-ojs-10.1177_23259671211013327.pdf [file sj-pdf-1-ojs-10.1177_23259671211013327.pdf]

Supplemental Material

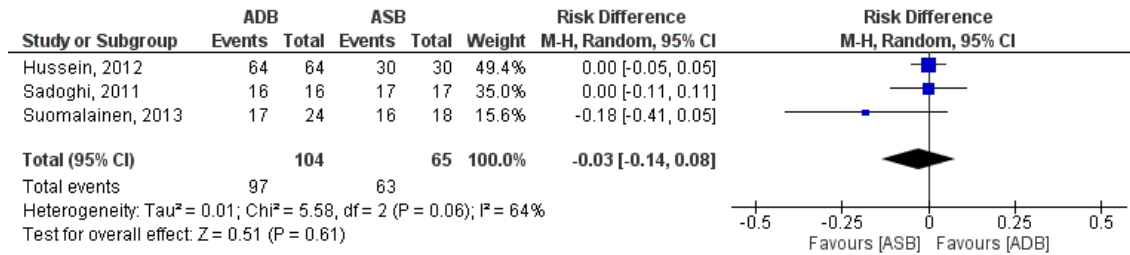

Figure S1. Meta-analysis of single- vs double-bundle anatomic ACL reconstruction evaluating IKDC objective score.

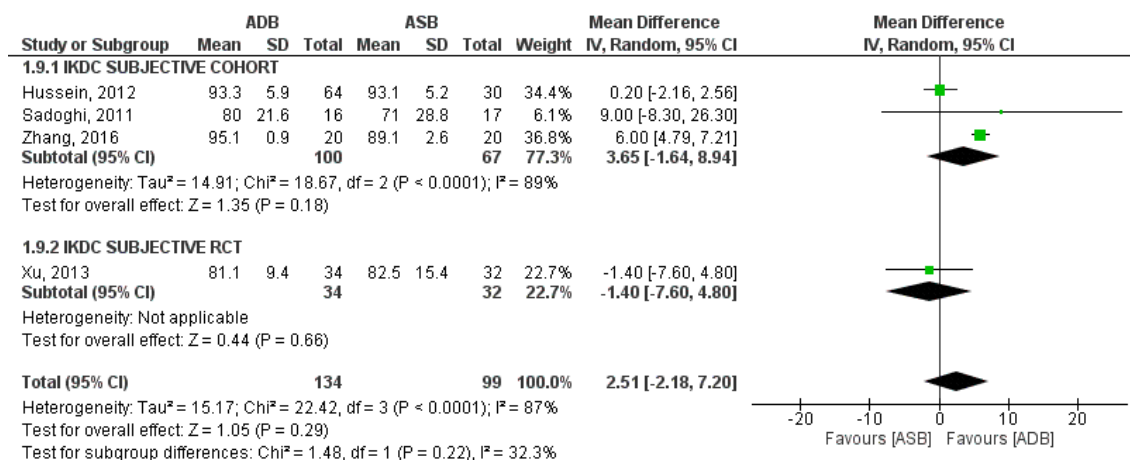

Figure S2. Meta-analysis of single- vs double-bundle anatomic ACL reconstruction evaluating IKDC subjective score.

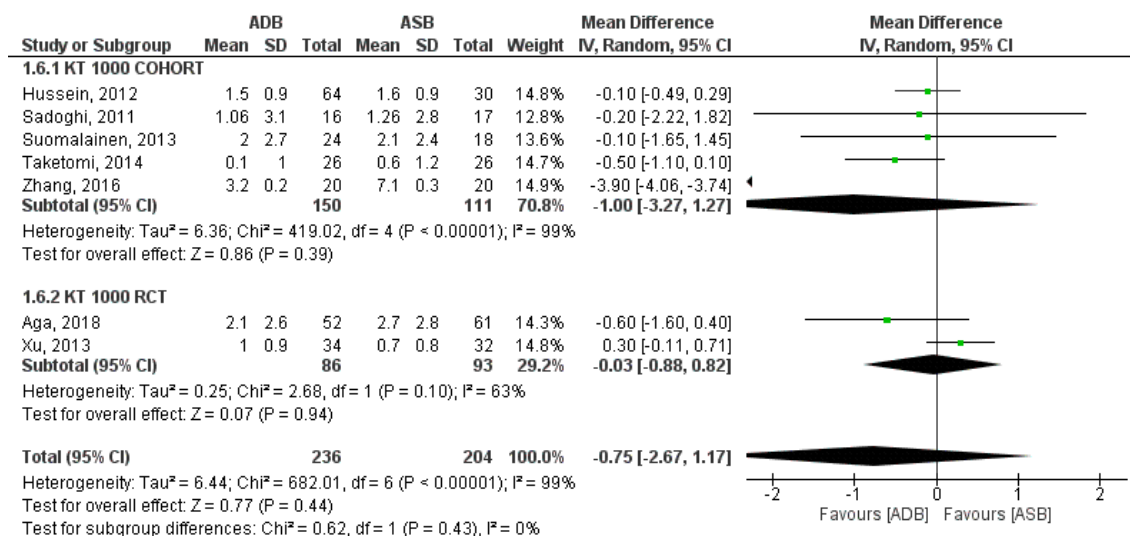

Figure S3. Meta-analysis of single- vs double-bundle anatomic ACL reconstruction evaluating KT-1000 arthrometer test.

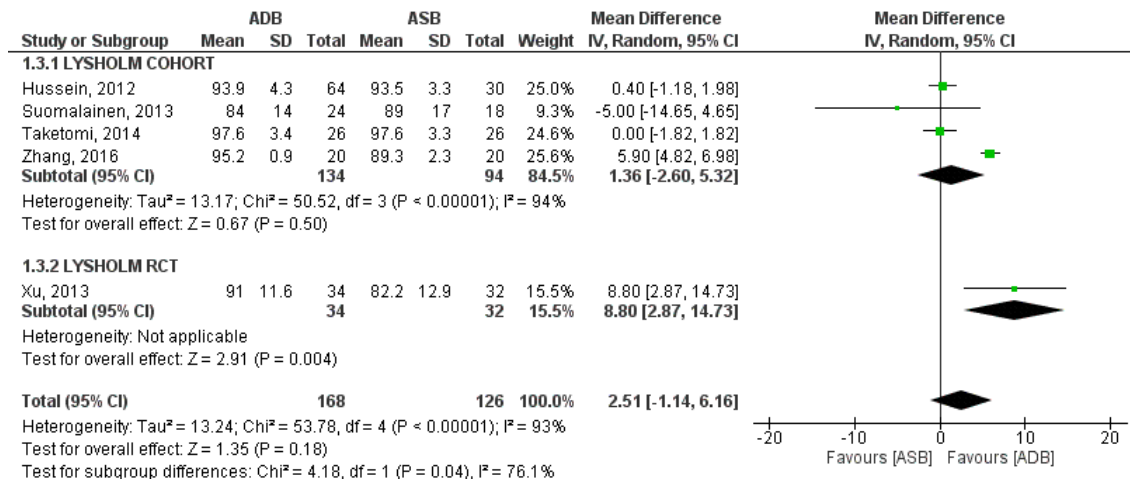

Figure S4. Meta-analysis of single- vs double-bundle anatomic ACL reconstruction evaluating Lysholm score.

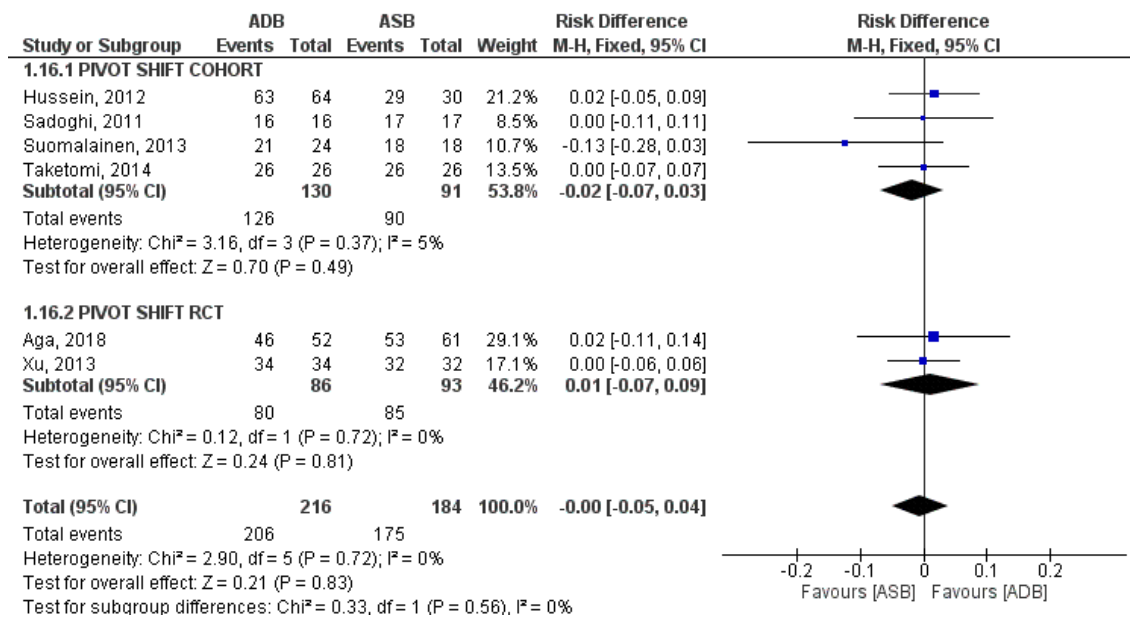

Figure S5. Meta-analysis of single- vs double-bundle anatomic ACL reconstruction evaluating pivot-shift test.

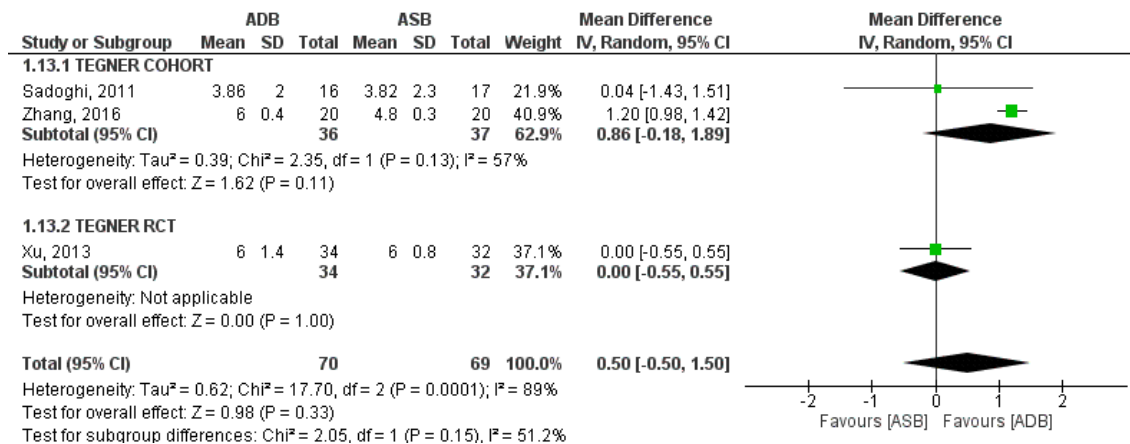

Figure S6. Meta-analysis of single- vs double-bundle anatomic ACL reconstruction evaluating Tegner score.

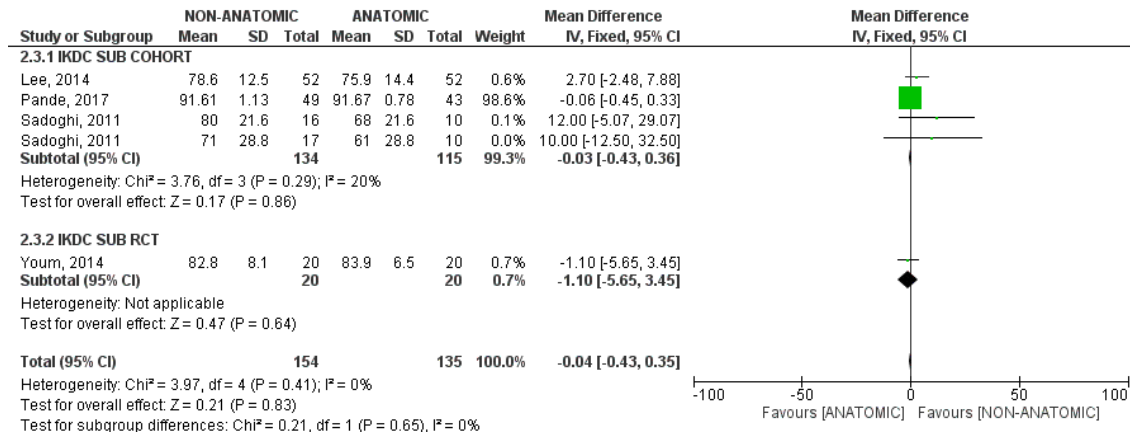

Figure S7. Meta-analysis of nonanatomic vs anatomic ACL reconstruction evaluating IKDC subjective score.

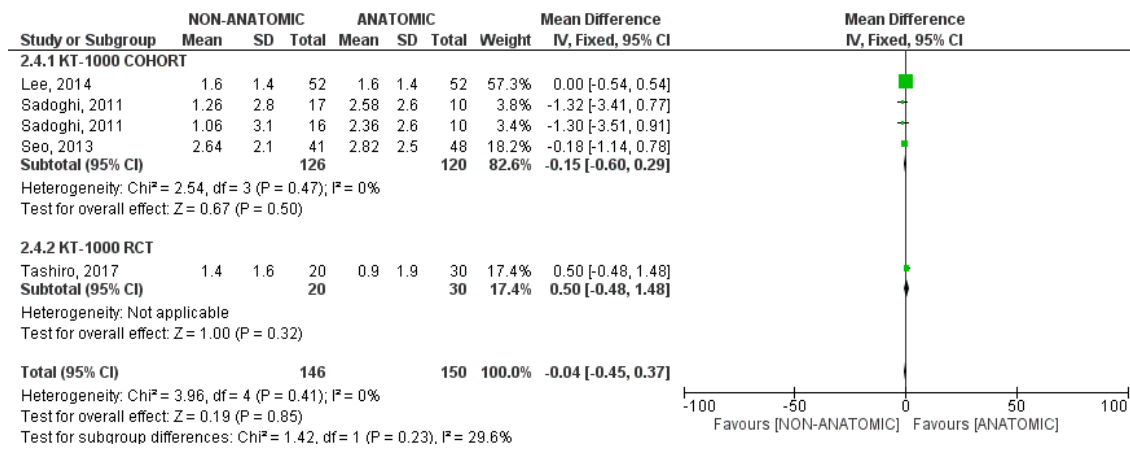

Figure S8. Meta-analysis of nonanatomic vs anatomic ACL reconstruction evaluating KT-1000 arthrometer test.

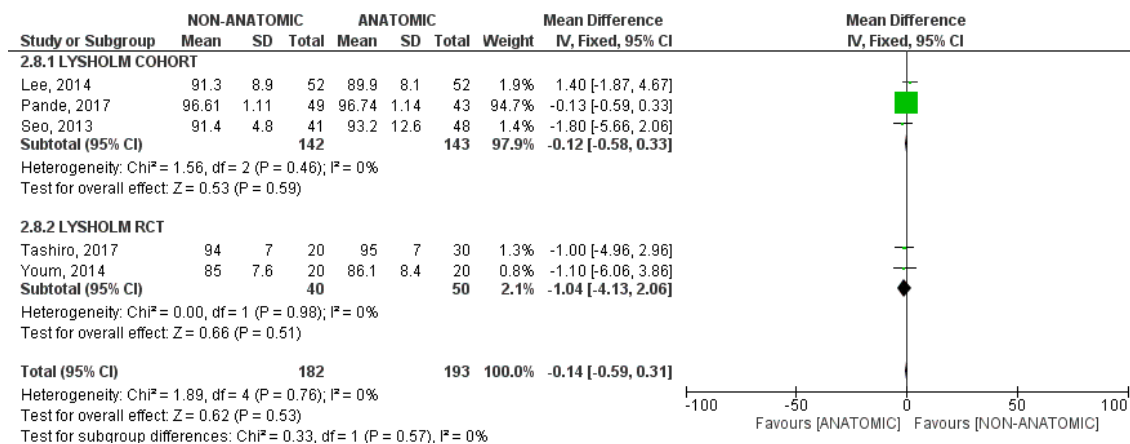

Figure S9. Meta-analysis of nonanatomic vs anatomic ACL reconstruction evaluating Lysholm score.

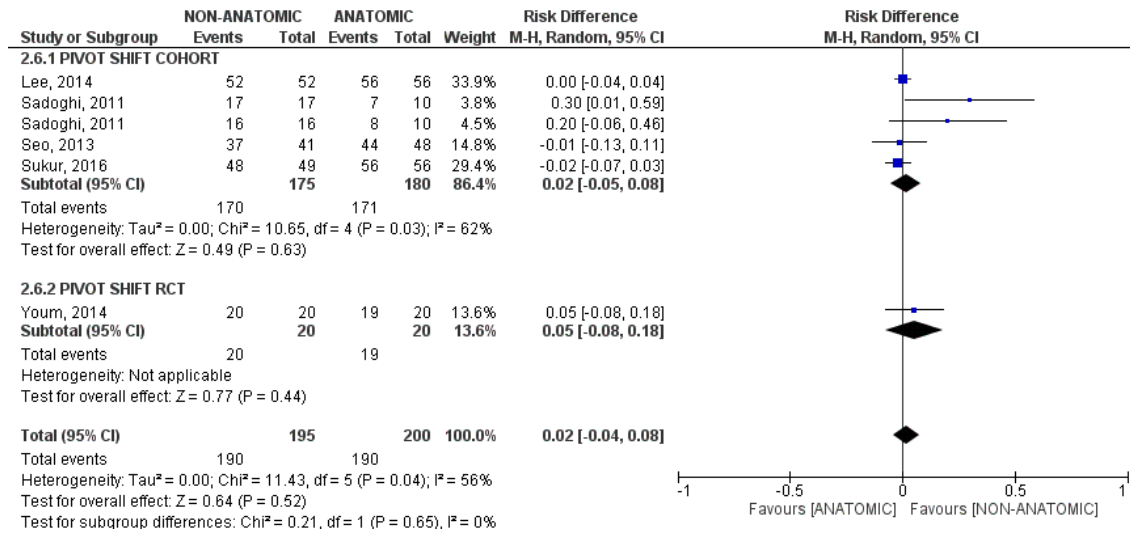

Figure S10. Meta-analysis of nonanatomic vs anatomic ACL reconstruction evaluating pivot-shift test.

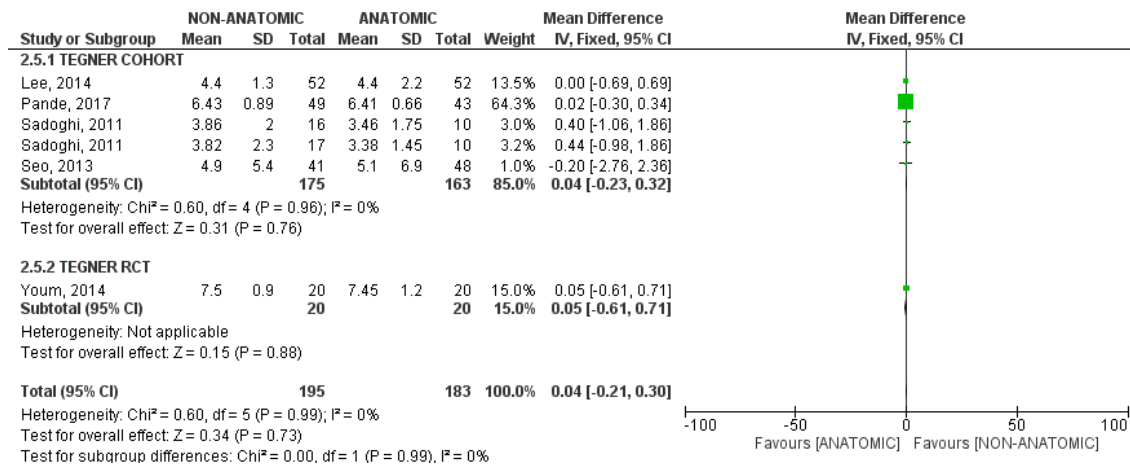

Figure S11. Meta-analysis of nonanatomic vs anatomic ACL reconstruction evaluating Tegner score.

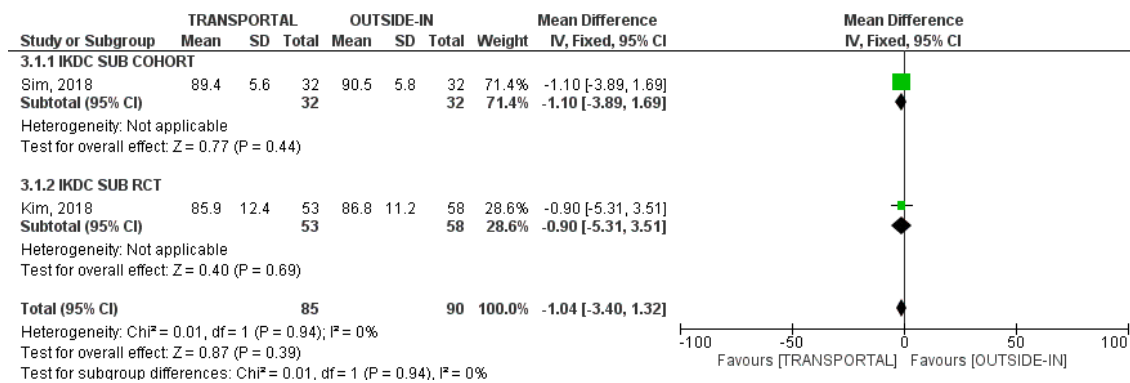

Figure S12. Meta-analysis of transportal vs outside-in techniques in ACL reconstruction evaluating IKDC subjective score.

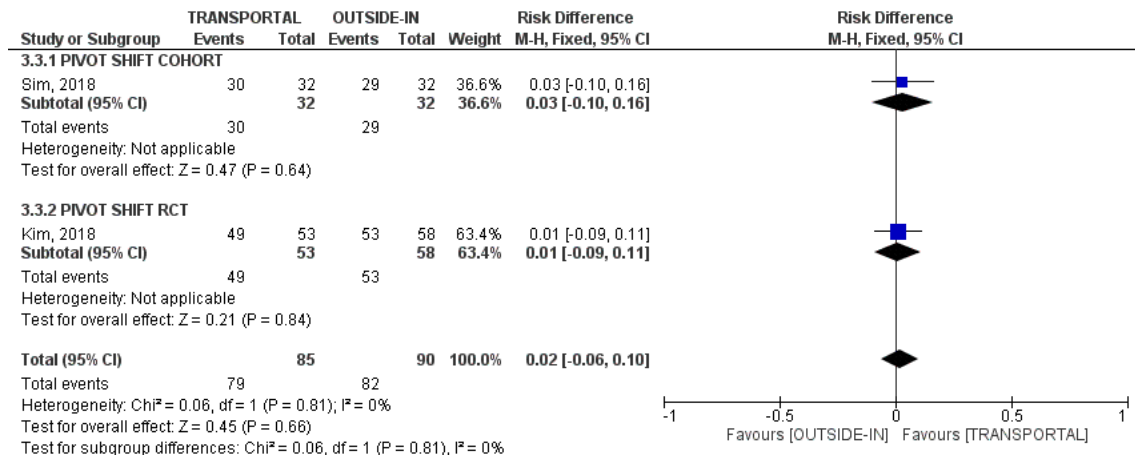

Figure S13. Meta-analysis of transportal vs outside-in techniques in ACL reconstruction evaluating pivot-shift test.

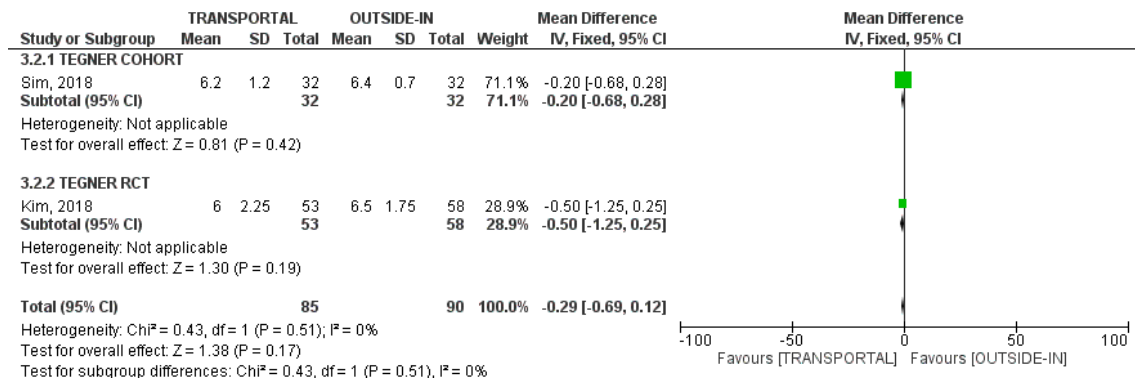

Figure S14. Meta-analysis of transportal vs outside-in techniques in ACL reconstruction evaluating Tegner score.
